# Supplementary material for: Electrifying Tourist Mobility in Bali, Indonesia: Setting the Target and Estimating the CO2 Reduction Based on Stated Choice Experiment
Source: MDPI journal article supplement (doi:10.3390/su132111656), 2021-10-21
Supplement: s1 [file s1]

---

## Supplementary Materials: Electric vehicle preference survey for Bali tourists survey

1. What is your residential status in Bali? \*

*Mark only one answer.*

- 1) Permanent resident
- 2) Temporary resident
- 3) Local tourist
- 4) International tourist

### Recreational activity characteristics

2. Number of visits in the last 2 years (e.g., 1, 2,...) \*

---

3. Staying place in Bali \*

*Mark only one answer.*

- 1) Tabanan
- 2) Badung
- 3) Gianyar
- 4) Denpasar
- 5) Bangli
- 6) Karangasem
- 7) Klungkung
- 8) Buleleng
- 9) Jembrana

4. Recreational place in Bali \*

*Check all that apply.*

- 1) Tabanan
- 2) Badung
- 3) Gianyar
- 4) Denpasar
- 5) Bangli
- 6) Karangasem
- 7) Klungkung
- 8) Buleleng
- 9) Jembrana

5. How many places you visit in a day? \*

*Mark only one answer.*

- 1) 1
- 2) 2
- 3) 3

- 4) 4
- 5) 5
- 6) 6 or more

6. Your itinerary in Bali (you can select more than 1) \*

*Check all that apply.*

- 1) Restaurant
- 2) Mountain
- 3) Beach
- 4) Lake
- 5) Café/bar
- 6) Other:

7. Staying period \*

*Mark only one answer.*

- 1) day
- 2) days
- 3) days
- 4) days
- 5) days
- 6) days
- 7) days or more

8. Number of people traveling together/travel companion(s) (e.g., 0, 1, 2) \*

---

**Travel characteristic in Bali**

9. Main transportation mode during your stay in Bali \*

*Mark only one answer.*

- 1) Bus
- 2) Paratransit
- 3) Online taxi (go-car, grab-car, etc)
- 4) Taxi
- 5) Online motorcycle taxi (go-jek, grab-bike, etc)
- 6) Car rental
- 7) Motorcycle rental
- 8) Private car
- 9) Private motorcycle

10. Average trip distance in a day \*

*Mark only one answer.*

- 1) < 2 km
- 2) 5-10 km

- 3) 10.1-20 km
- 4) 20-30 km
- 5) >30 km

### Trip cost in Bali

11. Public transportation (bus, angkot) cost per day \*

*Mark only one answer.*

- 1) Not using public transportation at all
- 2) < IDR 20,000
- 3) IDR 20,000-40,000
- 4) IDR 40,001-60,000
- 5) IDR 60,001-80,000
- 6) IDR 80,001-100,000
- 7) > IDR 100,000

12. Motorcycle/car rental cost per day \*

*Mark only one answer.*

- 1) Not renting at all
- 2) < IDR 50,000
- 3) IDR 50,001-100,000
- 4) IDR 100,001-200,000
- 5) IDR 200,001-400,000
- 6) > IDR 400,000

13. Fuel price in a day \*

*Mark only one answer.*

- 1) No fuel cost
- 2) < IDR 20,000
- 3) IDR 20,000-40,000
- 4) IDR 40,001-60,000
- 5) IDR 60,001-80,000
- 6) > IDR 80,000

14. Additional cost (toll, parking) in a day \*

*Mark only one answer.*

- 1) No additional cost
- 2) < IDR 20,000
- 3) IDR 20,000-40,000
- 4) > IDR 40,000

---

**Preference towards EV**

15. Do you have electric vehicle(s) at your home? \*

*Check all that apply.*

- 1) Yes, car
- 2) Yes, motorcycle
- 3) Yes, bicycle
- 4) No

16. Do you know that Bali's government are planning to build infrastructure to support EV adoption?\*

*Mark only one answer.*

- 1) Yes
- 2) No

17. Which electric vehicle will you choose to rent in Bali? \*

*Mark only one answer.*

- 1) Motorcycle
- 2) Car
- 3) Both
- 4) None of above

18. How much will you spent for renting an electric car for a day? \*

*Mark only one answer.*

- 1) <IDR 500 thousand
- 2) IDR 500-750 thousand
- 3) IDR 750 thousand - IDR 1 million
- 4) >IDR 1 million

19. How much will you spent for renting an electric motorcycle for a day? \*

*Mark only one answer.*

- 1) <IDR 50 thousand
- 2) IDR 50-75 thousand
- 3) IDR 75-100 thousand
- 4) >IDR 100 thousand

## Stated Preference of Mode choice (example of one of the set)

### 20. Mode choice for scenario 1: \*

*Mark only one answer.*

| Characteristics                   | Trans Metro Dewata | Car rental |             | Motorcycle rental |             | Car ride-hailing | Motorcycle ride-hailing |
|-----------------------------------|--------------------|------------|-------------|-------------------|-------------|------------------|-------------------------|
| Energy source                     | Electricity        | Fuel       | Electricity | Fuel              | Electricity | Fuel             | Fuel                    |
| Rental cost (000 IDR)             |                    | 300 k      | 300 k       | 50 k              | 150 k       |                  |                         |
| Daily operational cost (000 IDR)  | 36 k               | 20 k       | 50 k        | 5 k               | 10 k        | 40 k             | 150 k                   |
| Daily access cost (000 IDR)       | 10 k               |            |             |                   |             |                  |                         |
| Parking cost (000 IDR)            |                    | 15 k       | 10 k        | 2 k               | 0 k         |                  |                         |
| Travel time per trip (minutes)    | 45                 | 45         | 35          | 20                | 25          | 20               | 45                      |
| Access time per trip (minutes)    | 0                  |            |             |                   |             |                  |                         |
| Waiting time per trip (minutes)   | 15                 |            |             |                   |             | 10               | 10                      |
| Speed of charging (kWh)           |                    |            | 22          |                   | 75          |                  |                         |
| CO <sub>2</sub> Emission (kg)     | 2                  | 15         | 10          | 7                 | 3           | 7                | 12                      |
| Distance to charging station (km) |                    |            | 4           |                   | 2           |                  |                         |

- 1) Trans Metro Dewata (bus)
- 2) Fuel-based car rental
- 3) Electric car rental
- 4) Fuel-based motorcycle rental
- 5) Electric motorcycle rental
- 6) Motorcycle ride-hailing
- 7) Car ride-hailing

### 21. Mode choice for scenario 2: \*

*Mark only one answer.*

| Characteristics                   | Trans Metro Dewata | Car rental |             | Motorcycle rental |             | Car ride-hailing | Motorcycle ride-hailing |
|-----------------------------------|--------------------|------------|-------------|-------------------|-------------|------------------|-------------------------|
| Energy source                     | Fuel               | Fuel       | Electricity | Fuel              | Electricity | Fuel             | Fuel                    |
| Rental cost (000 IDR)             |                    | 400 k      | 300 k       | 100 k             | 50 k        |                  |                         |
| Daily operational cost (000 IDR)  | 18 k               | 50 k       | 20 k        | 40 k              | 20 k        | 60 k             | 200 k                   |
| Daily access cost (000 IDR)       | 15 k               |            |             |                   |             |                  |                         |
| Parking cost (000 IDR)            |                    | 15 k       | 0 k         | 2 k               | 2 k         |                  |                         |
| Travel time per trip (minutes)    | 45                 | 45         | 45          | 15                | 25          | 15               | 45                      |
| Access time per trip (minutes)    | 10                 |            |             |                   |             |                  |                         |
| Waiting time per trip (minutes)   | 5                  |            |             |                   |             | 5                | 5                       |
| Speed of charging (kWh)           |                    |            | 22          |                   | 22          |                  |                         |
| CO <sub>2</sub> Emission (kg)     | 5                  | 10         | 10          | 6                 | 5           | 7                | 12                      |
| Distance to charging station (km) |                    |            | 4           |                   | 2           |                  |                         |

- 1) Trans Metro Dewata (bus)
- 2) Fuel-based car rental
- 3) Electric car rental
- 4) Fuel-based motorcycle rental

- 5) Electric motorcycle rental
- 6) Motorcycle ride-hailing
- 7) Car ride-hailing

22. Mode choice for scenario 3: \*

*Mark only one answer.*

| Characteristics                   | Trans Metro Dewata | Car rental |             | Motorcycle rental |             | Car ride-hailing | Motorcycle ride-hailing |
|-----------------------------------|--------------------|------------|-------------|-------------------|-------------|------------------|-------------------------|
| Energy source                     | Fuel               | Fuel       | Electricity | Fuel              | Electricity | Fuel             | Fuel                    |
| Rental cost (000 IDR)             |                    | 400 k      | 300 k       | 100 k             | 150 k       |                  |                         |
| Daily operational cost (000 IDR)  | 48 k               | 100 k      | 50 k        | 40 k              | 20 k        | 60 k             | 200 k                   |
| Daily access cost (000 IDR)       | 10 k               |            |             |                   |             |                  |                         |
| Parking cost (000 IDR)            |                    | 10 k       | 15 k        | 7.5 k             | 0 k         |                  |                         |
| Travel time per trip (minutes)    | 60                 | 35         | 35          | 15                | 20          | 25               | 45                      |
| Access time per trip (minutes)    | 20                 |            |             |                   |             |                  |                         |
| Waiting time per trip (minutes)   | 5                  |            |             |                   |             | 15               | 10                      |
| Speed of charging (kWh)           |                    |            | 22          |                   | 22          |                  |                         |
| CO <sub>2</sub> Emission (kg)     | 4                  | 15         | 7           | 7                 | 3           | 6                | 12                      |
| Distance to charging station (km) |                    |            | 2           |                   | 2           |                  |                         |

- 1) Trans Metro Dewata (bus)
- 2) Fuel-based car rental
- 3) Electric car rental
- 4) Fuel-based motorcycle rental
- 5) Electric motorcycle rental
- 6) Motorcycle ride-hailing
- 7) Car ride-hailing

23. Mode choice for scenario 4: \*

*Mark only one answer.*

| Characteristics                   | Trans Metro Dewata | Car rental |             | Motorcycle rental |             | Car ride-hailing | Motorcycle ride-hailing |
|-----------------------------------|--------------------|------------|-------------|-------------------|-------------|------------------|-------------------------|
| Energy source                     | Electricity        | Fuel       | Electricity | Fuel              | Electricity | Fuel             | Fuel                    |
| Rental cost (000 IDR)             |                    | 300 k      | 500 k       | 100 k             | 50 k        |                  |                         |
| Daily operational cost (000 IDR)  | 48 k               | 50 k       | 15 k        | 40 k              | 5 k         | 60 k             | 100 k                   |
| Daily access cost (000 IDR)       | 15 k               |            |             |                   |             |                  |                         |
| Parking cost (000 IDR)            |                    | 15 k       | 10 k        | 7.5 k             | 5 k         |                  |                         |
| Travel time per trip (minutes)    | 30                 | 45         | 25          | 25                | 25          | 25               | 25                      |
| Access time per trip (minutes)    | 10                 |            |             |                   |             |                  |                         |
| Waiting time per trip (minutes)   | 10                 |            |             |                   |             | 10               | 10                      |
| Speed of charging (kWh)           |                    |            | 75          |                   | 75          |                  |                         |
| CO <sub>2</sub> Emission (kg)     | 2                  | 12         | 7           | 5                 | 3           | 6                | 15                      |
| Distance to charging station (km) |                    |            | 4           |                   | 4           |                  |                         |

- 1) Trans Metro Dewata (bus)
- 2) Fuel-based car rental
- 3) Electric car rental
- 4) Fuel-based motorcycle rental

- 5) Electric motorcycle rental
- 6) Motorcycle ride-hailing
- 7) Car ride-hailing

24. Mode choice for scenario 5: \*

*Mark only one answer.*

| Characteristics                   | Trans Metro Dewata | Car rental |             | Motorcycle rental |             | Car ride-hailing | Motorcycle ride-hailing |
|-----------------------------------|--------------------|------------|-------------|-------------------|-------------|------------------|-------------------------|
| Energy source                     | Fuel               | Fuel       | Electricity | Fuel              | Electricity | Fuel             | Electricity             |
| Rental cost (000 IDR)             |                    | 500 k      | 400 k       | 100 k             | 150 k       |                  |                         |
| Daily operational cost (000 IDR)  | 18 k               | 50 k       | 15 k        | 5 k               | 20 k        | 60 k             | 150 k                   |
| Daily access cost (000 IDR)       | 10 k               |            |             |                   |             |                  |                         |
| Parking cost (000 IDR)            |                    | 10 k       | 0 k         | 7.5 k             | 5 k         |                  |                         |
| Travel time per trip (minutes)    | 30                 | 45         | 45          | 15                | 20          | 25               | 35                      |
| Access time per trip (minutes)    | 10                 |            |             |                   |             |                  |                         |
| Waiting time per trip (minutes)   | 15                 |            |             |                   |             | 15               | 10                      |
| Speed of charging (kWh)           |                    |            | 75          |                   | 22          |                  |                         |
| CO <sub>2</sub> Emission (kg)     | 5                  | 10         | 7           | 5                 | 5           | 6                | 10                      |
| Distance to charging station (km) |                    |            | 2           |                   | 2           |                  |                         |

- 1) Trans Metro Dewata (bus)
- 2) Fuel-based car rental
- 3) Electric car rental
- 4) Fuel-based motorcycle rental
- 5) Electric motorcycle rental
- 6) Motorcycle ride-hailing
- 7) Car ride-hailing

25. Mode choice for scenario 6: \*

*Mark only one answer.*

| Characteristics                   | Trans Metro Dewata | Car rental |             | Motorcycle rental |             | Car ride-hailing | Motorcycle ride-hailing |
|-----------------------------------|--------------------|------------|-------------|-------------------|-------------|------------------|-------------------------|
| Energy source                     | Fuel               | Fuel       | Electricity | Fuel              | Electricity | Electricity      | Electricity             |
| Rental cost (000 IDR)             |                    | 400 k      | 400 k       | 50 k              | 150 k       |                  |                         |
| Daily operational cost (000 IDR)  | 18 k               | 50 k       | 20 k        | 5 k               | 10 k        | 40 k             | 150 k                   |
| Daily access cost (000 IDR)       | 20 k               |            |             |                   |             |                  |                         |
| Parking cost (000 IDR)            |                    | 20 k       | 15 k        | 7.5 k             | 0 k         |                  |                         |
| Travel time per trip (minutes)    | 45                 | 35         | 25          | 20                | 20          | 20               | 45                      |
| Access time per trip (minutes)    | 20                 |            |             |                   |             |                  |                         |
| Waiting time per trip (minutes)   | 15                 |            |             |                   |             | 15               | 5                       |
| Speed of charging (kWh)           |                    |            | 75          |                   | 22          |                  |                         |
| CO <sub>2</sub> Emission (kg)     | 4                  | 10         | 7           | 6                 | 3           | 5                | 10                      |
| Distance to charging station (km) |                    |            | 4           |                   | 4           |                  |                         |

- 1) Trans Metro Dewata (bus)
- 2) Fuel-based car rental
- 3) Electric car rental

- 4) Fuel-based motorcycle rental
- 5) Electric motorcycle rental
- 6) Motorcycle ride-hailing
- 7) Car ride-hailing

**Personal characteristic**

26. Age \*

\_\_\_\_\_

27. Gender \*

*Mark only one answer.*

- 1) Male
- 2) Female
- 3) Prefer not to answer

28. Monthly income \*

*Mark only one answer.*

- 1) < IDR 3,000,000
- 2) IDR 3,000,000 - IDR 5,000,000
- 3) IDR 5,000,001 - IDR 7,000,000
- 4) IDR 7,000,001 - IDR 10,000,000
- 5) IDR 10,000,001 - IDR 15,000,000
- 6) >IDR 15,000,000

29. Occupation field \*

*Mark only one answer.*

- 1) Civil Servant
- 2) Private company employee
- 3) Lecturer/teacher
- 4) Student
- 5) Health worker
- 6) Housewife
- 7) Self-employed/entrepreneur
- 8) Free-lancer
- 9) Unemployed/retired
- 10) Other: \_\_\_\_\_
